# Supplementary material for: A patient-derived and patient-reported outcome measure for assessing psoriatic arthritis: elaboration and preliminary validation of the Psoriatic Arthritis Impact of Disease (PsAID) questionnaire, a 13-country EULAR initiative
Source: HighWire-hosted journal article supplement (doi:10.1136/annrheumdis-2014-205207), 2014-04-30
Supplement: annrheumdis-2014-205207supp_figures.pdf [file annrheumdis-2014-205207supp_figures.pdf]

Online supplementary Figure S1 – The process used to develop the PsAID

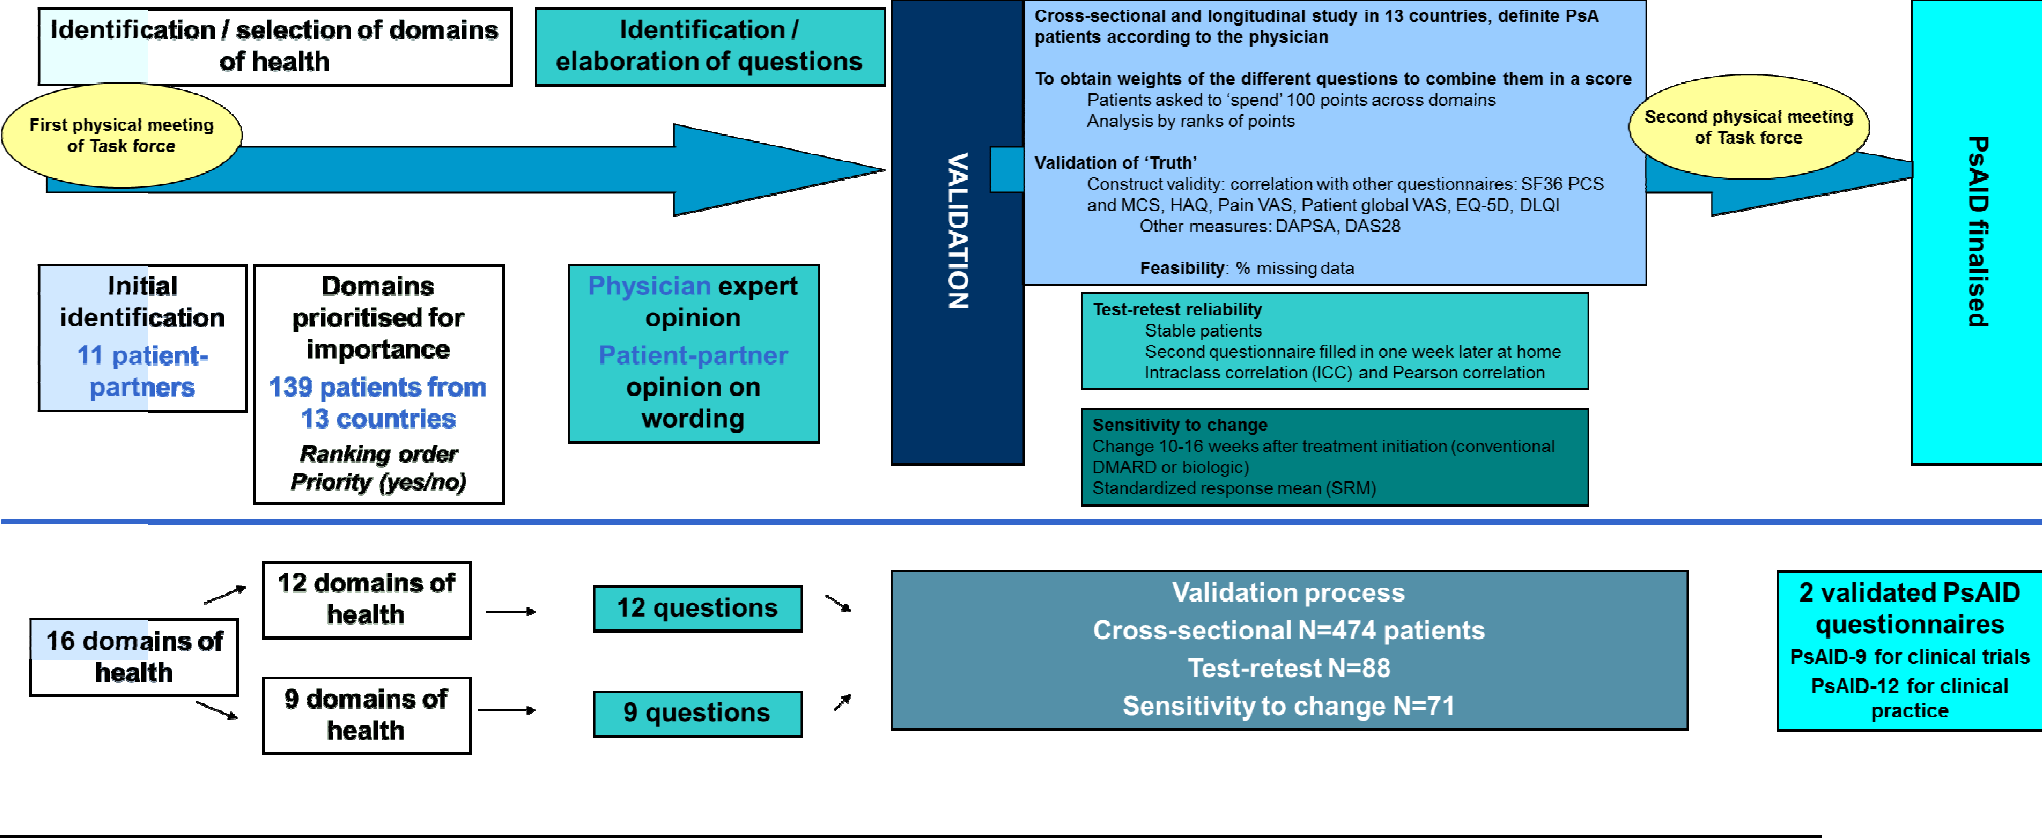

**Online Figure S2.** Agreement between PsAID-9 and PsAID-12 score results in 474 PsA patients by Bland and Altman technique.

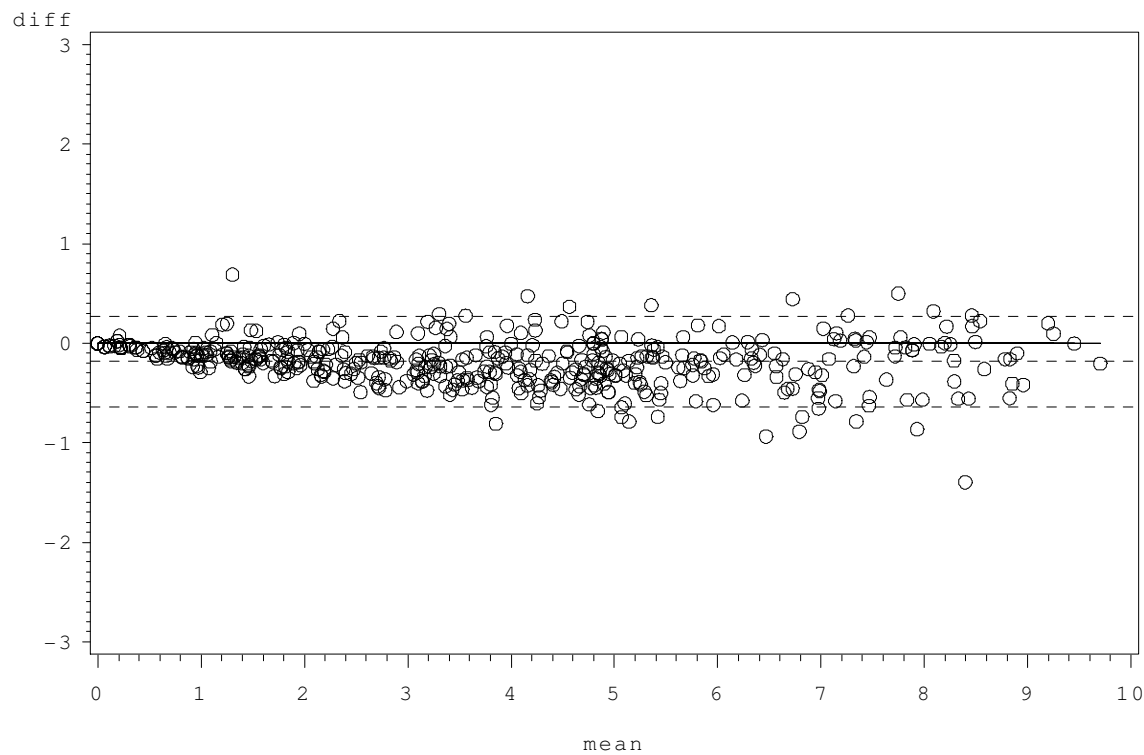

Agreement was high, with a mean difference close to 0 and agreement limits of -0.7 to +0.3.
