# Supplementary material for: A patient-derived and patient-reported outcome measure for assessing psoriatic arthritis: elaboration and preliminary validation of the Psoriatic Arthritis Impact of Disease (PsAID) questionnaire, a 13-country EULAR initiative
Source: HighWire-hosted journal article supplement (doi:10.1136/annrheumdis-2014-205207), 2014-04-30
Supplement: annrheumdis-2014-205207supp_final-psaid-score.pdf [file annrheumdis-2014-205207supp_final-psaid-score.pdf]

## The EULAR Psoriatic Arthritis Impact of Disease: PsAID9 for clinical trials

We want you to indicate how much your psoriatic arthritis impacts your health. Please tell us how you have been feeling this last week.

### 1. Pain

Circle the number that best describes the pain you felt due to your psoriatic arthritis during the last week:

|      |   |   |   |   |   |   |   |   |   |   |    |         |
|------|---|---|---|---|---|---|---|---|---|---|----|---------|
| None | 0 | 1 | 2 | 3 | 4 | 5 | 6 | 7 | 8 | 9 | 10 | Extreme |
|------|---|---|---|---|---|---|---|---|---|---|----|---------|

### 2. Fatigue

Circle the number that best describes the overall level of fatigue due to your psoriatic arthritis you have experienced during the last week:

|            |   |   |   |   |   |   |   |   |   |   |    |                   |
|------------|---|---|---|---|---|---|---|---|---|---|----|-------------------|
| No fatigue | 0 | 1 | 2 | 3 | 4 | 5 | 6 | 7 | 8 | 9 | 10 | Totally exhausted |
|------------|---|---|---|---|---|---|---|---|---|---|----|-------------------|

### 3. Skin problems

Circle the number that best describes the skin problems including itching you felt due to your psoriatic arthritis during the last week:

|      |   |   |   |   |   |   |   |   |   |   |    |         |
|------|---|---|---|---|---|---|---|---|---|---|----|---------|
| None | 0 | 1 | 2 | 3 | 4 | 5 | 6 | 7 | 8 | 9 | 10 | Extreme |
|------|---|---|---|---|---|---|---|---|---|---|----|---------|

### 4. Work and/or leisure activities

Circle the number that best describes the difficulties you had to participate fully in work and/or leisure activities due to your psoriatic arthritis during the last week:

|      |   |   |   |   |   |   |   |   |   |   |    |         |
|------|---|---|---|---|---|---|---|---|---|---|----|---------|
| None | 0 | 1 | 2 | 3 | 4 | 5 | 6 | 7 | 8 | 9 | 10 | Extreme |
|------|---|---|---|---|---|---|---|---|---|---|----|---------|

### 5. Functional capacity

Circle the number that best describes the difficulty you had in doing daily physical activities due to your psoriatic arthritis during the last week:

|               |   |   |   |   |   |   |   |   |   |   |    |                    |
|---------------|---|---|---|---|---|---|---|---|---|---|----|--------------------|
| No difficulty | 0 | 1 | 2 | 3 | 4 | 5 | 6 | 7 | 8 | 9 | 10 | Extreme difficulty |
|---------------|---|---|---|---|---|---|---|---|---|---|----|--------------------|

### 6. Discomfort

Circle the number that best describes the feeling of discomfort and annoyance with everyday tasks due to your psoriatic arthritis during the last week:

|      |   |   |   |   |   |   |   |   |   |   |    |         |
|------|---|---|---|---|---|---|---|---|---|---|----|---------|
| None | 0 | 1 | 2 | 3 | 4 | 5 | 6 | 7 | 8 | 9 | 10 | Extreme |
|------|---|---|---|---|---|---|---|---|---|---|----|---------|

### 7. Sleep disturbance

Circle the number that best describes the sleep difficulties (i.e., resting at night) you felt due to your psoriatic arthritis during the last week:

|               |   |   |   |   |   |   |   |   |   |   |    |                    |
|---------------|---|---|---|---|---|---|---|---|---|---|----|--------------------|
| No difficulty | 0 | 1 | 2 | 3 | 4 | 5 | 6 | 7 | 8 | 9 | 10 | Extreme difficulty |
|---------------|---|---|---|---|---|---|---|---|---|---|----|--------------------|

**8. Coping**

Considering your psoriatic arthritis overall, how well did you cope (manage, deal, make do) with your psoriatic arthritis during the last week?

|           |   |   |   |   |   |   |   |   |   |   |    |             |
|-----------|---|---|---|---|---|---|---|---|---|---|----|-------------|
| Very well | 0 | 1 | 2 | 3 | 4 | 5 | 6 | 7 | 8 | 9 | 10 | Very poorly |
|-----------|---|---|---|---|---|---|---|---|---|---|----|-------------|

**9. Anxiety, fear and uncertainty**

Circle the number that best describes the level of anxiety, fear and uncertainty (for example about the future, treatments, fear of loneliness) due to your psoriatic arthritis you have experienced during the last week:

|      |   |   |   |   |   |   |   |   |   |   |    |         |
|------|---|---|---|---|---|---|---|---|---|---|----|---------|
| None | 0 | 1 | 2 | 3 | 4 | 5 | 6 | 7 | 8 | 9 | 10 | Extreme |
|------|---|---|---|---|---|---|---|---|---|---|----|---------|

**THANK YOU FOR ANSWERING THIS QUESTIONNAIRE**

## PsAID9 SCORING AND CALCULATION RULES

The PsAID is calculated based on 9 Numerical rating scales (NRS) questions. Each NRS is assessed as a number between 0 and 10.

### 1. Calculation

PsAID final value =

$$\begin{aligned} & (\text{PsAID1 (pain) NRS value (range 0-10)} \times 0.174) \\ & + (\text{PsAID2 (fatigue) NRS value (range 0-10)} \times 0.131) \\ & + (\text{PsAID3 (skin) NRS value (range 0-10)} \times 0.121) \\ & + (\text{PsAID4 (Work and/or leisure activities) NRS value (range 0-10)} \times 0.110) \\ & + (\text{PsAID5 (function) NRS value (range 0-10)} \times 0.107) \\ & + (\text{PsAID6 (discomfort) NRS value (range 0-10)} \times 0.098) \\ & + (\text{PsAID7 (sleep) NRS value (range 0-10)} \times 0.089) \\ & + (\text{PsAID8 (coping) NRS value (range 0-10)} \times 0.087) \\ & + (\text{PsAID9 (anxiety) NRS value (range 0-10)} \times 0.085) \end{aligned}$$

Thus, the range of the final PsAID value is 0-10 where higher figures indicate worse status.

### 2. Missing data imputation

If one of the 9 NRS values composing the PsAID is missing, the imputation is as follows:

- a. calculate the mean value of the 8 other (non-missing) NRS (range, 0-10)
- b. impute this value for the missing NRS
- c. Then, calculate the PsAID as explained above.

If 2 or more of the NRS are missing, the PsAID is considered as missing value (no imputation).

# The EULAR Psoriatic Arthritis Impact of Disease: PsAID12 for clinical practice

We want you to indicate how much your psoriatic arthritis impacts your health. Please tell us how you have been feeling this last week.

## 1. Pain

Circle the number that best describes the pain you felt due to your psoriatic arthritis during the last week

|      |   |   |   |   |   |   |   |   |   |   |    |         |
|------|---|---|---|---|---|---|---|---|---|---|----|---------|
| None | 0 | 1 | 2 | 3 | 4 | 5 | 6 | 7 | 8 | 9 | 10 | Extreme |
|------|---|---|---|---|---|---|---|---|---|---|----|---------|

|                          |
|--------------------------|
| For office use only      |
| Result x3                |
| <input type="checkbox"/> |

## 2. Fatigue

Circle the number that best describes the overall level of fatigue due to your psoriatic arthritis you have experienced during the last week:

|            |   |   |   |   |   |   |   |   |   |   |    |                   |
|------------|---|---|---|---|---|---|---|---|---|---|----|-------------------|
| No fatigue | 0 | 1 | 2 | 3 | 4 | 5 | 6 | 7 | 8 | 9 | 10 | Totally exhausted |
|------------|---|---|---|---|---|---|---|---|---|---|----|-------------------|

|                          |
|--------------------------|
| Result x2                |
| <input type="checkbox"/> |

## 3. Skin problems

Circle the number that best describes the skin problems including itching you felt due to your psoriatic arthritis during the last week:

|      |   |   |   |   |   |   |   |   |   |   |    |         |
|------|---|---|---|---|---|---|---|---|---|---|----|---------|
| None | 0 | 1 | 2 | 3 | 4 | 5 | 6 | 7 | 8 | 9 | 10 | Extreme |
|------|---|---|---|---|---|---|---|---|---|---|----|---------|

|                          |
|--------------------------|
| Result x2                |
| <input type="checkbox"/> |

## 4. Work and/or leisure activities

Circle the number that best describes the difficulties you had to participate fully in work and/or leisure activities due to your psoriatic arthritis during the last week:

|      |   |   |   |   |   |   |   |   |   |   |    |         |
|------|---|---|---|---|---|---|---|---|---|---|----|---------|
| None | 0 | 1 | 2 | 3 | 4 | 5 | 6 | 7 | 8 | 9 | 10 | Extreme |
|------|---|---|---|---|---|---|---|---|---|---|----|---------|

|                          |
|--------------------------|
| Result x2                |
| <input type="checkbox"/> |

## 5. Functional capacity

Circle the number that best describes the difficulty you had in doing daily physical activities due to your psoriatic arthritis during the last week:

|               |   |   |   |   |   |   |   |   |   |   |    |                    |
|---------------|---|---|---|---|---|---|---|---|---|---|----|--------------------|
| No difficulty | 0 | 1 | 2 | 3 | 4 | 5 | 6 | 7 | 8 | 9 | 10 | Extreme difficulty |
|---------------|---|---|---|---|---|---|---|---|---|---|----|--------------------|

|                          |
|--------------------------|
| Result x2                |
| <input type="checkbox"/> |

## 6. Discomfort

Circle the number that best describes the feeling of discomfort and annoyance with everyday tasks due to your psoriatic arthritis during the last week:

|      |   |   |   |   |   |   |   |   |   |   |    |         |
|------|---|---|---|---|---|---|---|---|---|---|----|---------|
| None | 0 | 1 | 2 | 3 | 4 | 5 | 6 | 7 | 8 | 9 | 10 | Extreme |
|------|---|---|---|---|---|---|---|---|---|---|----|---------|

|                          |
|--------------------------|
| Result x2                |
| <input type="checkbox"/> |

## 7. Sleep disturbance

Circle the number that best describes the sleep difficulties (i.e., resting at night) you felt due to your psoriatic arthritis during the last week:

|               |   |   |   |   |   |   |   |   |   |   |    |                    |
|---------------|---|---|---|---|---|---|---|---|---|---|----|--------------------|
| No difficulty | 0 | 1 | 2 | 3 | 4 | 5 | 6 | 7 | 8 | 9 | 10 | Extreme difficulty |
|---------------|---|---|---|---|---|---|---|---|---|---|----|--------------------|

|                          |
|--------------------------|
| Result x2                |
| <input type="checkbox"/> |

### 8. Coping

Considering your psoriatic arthritis overall, how well did you cope (manage, deal, make do) with your psoriatic arthritis during the last week?

|           |   |   |   |   |   |   |   |   |   |   |    |             |
|-----------|---|---|---|---|---|---|---|---|---|---|----|-------------|
| Very well | 0 | 1 | 2 | 3 | 4 | 5 | 6 | 7 | 8 | 9 | 10 | Very poorly |
|-----------|---|---|---|---|---|---|---|---|---|---|----|-------------|

For office use only

Result x1

### 9. Anxiety, fear and uncertainty

Circle the number that best describes the level of anxiety, fear and uncertainty (for example about the future, treatments, fear of loneliness) due to your psoriatic arthritis you have experienced during the last week:

|      |   |   |   |   |   |   |   |   |   |   |    |         |
|------|---|---|---|---|---|---|---|---|---|---|----|---------|
| None | 0 | 1 | 2 | 3 | 4 | 5 | 6 | 7 | 8 | 9 | 10 | Extreme |
|------|---|---|---|---|---|---|---|---|---|---|----|---------|

Result x1

### 10. Embarrassment and/or shame

Considering your psoriatic arthritis overall, circle the number that best describes the level of embarrassment and/or shame due to your appearance experienced during the last week:

|      |   |   |   |   |   |   |   |   |   |   |    |         |
|------|---|---|---|---|---|---|---|---|---|---|----|---------|
| None | 0 | 1 | 2 | 3 | 4 | 5 | 6 | 7 | 8 | 9 | 10 | Extreme |
|------|---|---|---|---|---|---|---|---|---|---|----|---------|

Result x1

### 11. Social participation

Circle the number that best describes the difficulties you had to participate fully in social activities (including relationships with family and/or people very close to you) due to your psoriatic arthritis during the last week:

|      |   |   |   |   |   |   |   |   |   |   |    |         |
|------|---|---|---|---|---|---|---|---|---|---|----|---------|
| None | 0 | 1 | 2 | 3 | 4 | 5 | 6 | 7 | 8 | 9 | 10 | Extreme |
|------|---|---|---|---|---|---|---|---|---|---|----|---------|

Result x1

### 12. Depression

Circle the number that best describes the level of depression due to your psoriatic arthritis you have experienced during the last week:

|      |   |   |   |   |   |   |   |   |   |   |    |         |
|------|---|---|---|---|---|---|---|---|---|---|----|---------|
| None | 0 | 1 | 2 | 3 | 4 | 5 | 6 | 7 | 8 | 9 | 10 | Extreme |
|------|---|---|---|---|---|---|---|---|---|---|----|---------|

Result x1

**THANK YOU FOR ANSWERING THIS QUESTIONNAIRE**

Final PsAID out of 10

Add up the  and divide by 20:

## PsAID12 SCORING AND CALCULATION RULES

The PsAID is calculated based on 12 Numerical rating scales (NRS) questions. Each NRS is assessed as a number between 0 and 10.

### 3. Calculation

PsAID final value =

- (PsAID1 (pain) NRS value (range 0-10) x 3)
- + (PsAID2 (fatigue) NRS value (range 0-10) x 2)
- + (PsAID3 (skin) NRS value (range 0-10) x 2)
- + (PsAID4 (Work and/or leisure activities) NRS value (range 0-10) x 2)
- + (PsAID5 (function) NRS value (range 0-10) x 2)
- + (PsAID6 (discomfort) NRS value (range 0-10) x 2)
- + (PsAID7 (sleep) NRS value (range 0-10) x 2)
- + (PsAID8 (coping) NRS value (range 0-10) x 1)
- + (PsAID9 (anxiety) NRS value (range 0-10) x 1)
- + (PsAID10 (embarrassment) NRS value (range 0-10) x 1)
- + (PsAID11 (social life) NRS value (range 0-10) x 1)
- + (PsAID12 (depression) NRS value (range 0-10) x 1)

The total is divided by 20.

Thus, the range of the final PsAID value is 0-10 where higher figures indicate worse status.

### 4. Missing data imputation

If one of the 12 NRS values composing the PsAID is missing, the imputation is as follows:

- a. calculate the mean value of the 11 other (non-missing) NRS (range, 0-10)
- b. impute this value for the missing NRS
- c. Then, calculate the PsAID as explained above.

If 2 or more of the NRS are missing, the PsAID is considered as missing value (no imputation).
